# Supplementary material
Source: PubMed Central journal article supplement (PMC4226351)
Supplement: supp_pp.114.241950_241950suppfigs.pdf [file supp_pp.114.241950_241950suppfigs.pdf]

SUPPLEMENTARY INFORMATION

**Indaziflam herbicidal action: a potent cellulose biosynthesis inhibitor**

Chad Brabham, Lei Lei, Ying Gu, Jozsef Stork, Michael Barrett and Seth DeBolt

Supplementary data

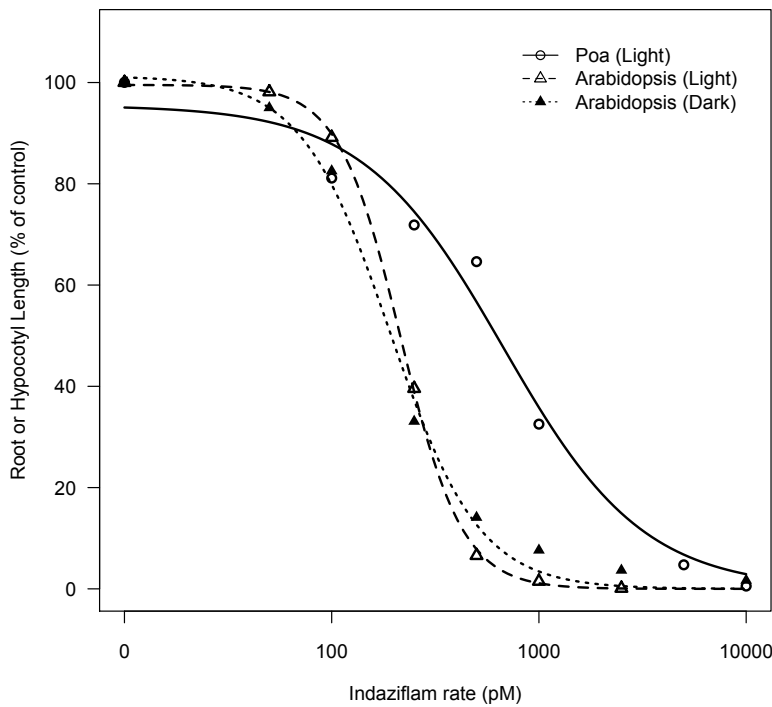

**Fig S1. Indaziflam dose response of *Poa annua* and *Arabidopsis*.** To establish dose responses, seedlings were germinated on agar plates in the light or dark containing indaziflam (rate refers to concentration and not based on area/planting density) ranging from 0 to 10,000 pM. Seedling root length (light) and hypocotyl (dark) were measured and standardized to percent of the untreated (N = 36).

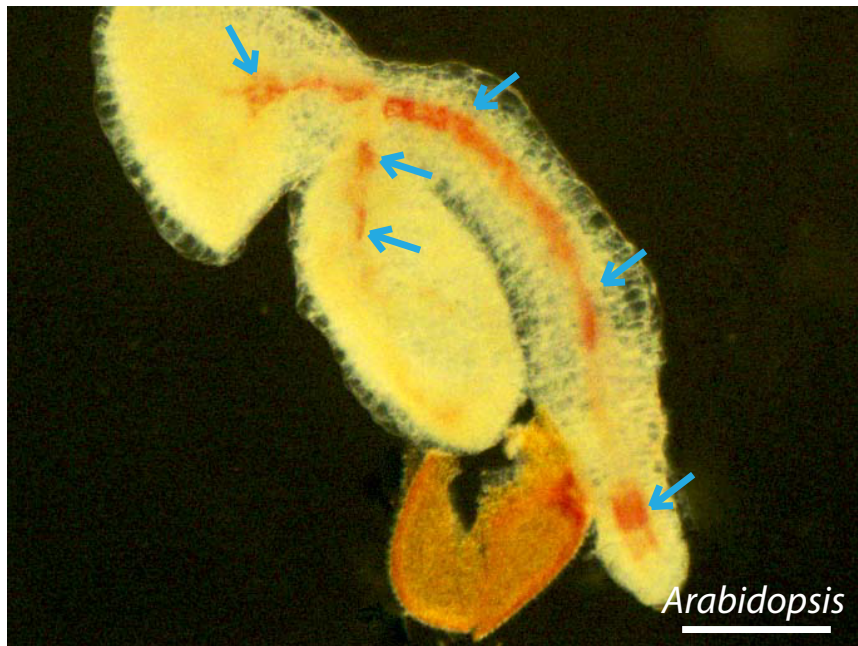

**Fig S2. Ectopic lignification was induced by indaziflam treatment.** Bright field stereomicroscopy image of a 7-day-old phloroglucinol stained *Arabidopsis* seedling treated with 500 pM indaziflam (Scale bar = 200  $\mu\text{m}$ ). Blue arrows illustrate patches of ectopic lignin, wild-type plants not treated with indaziflam display no red stained lignin (data not presented).

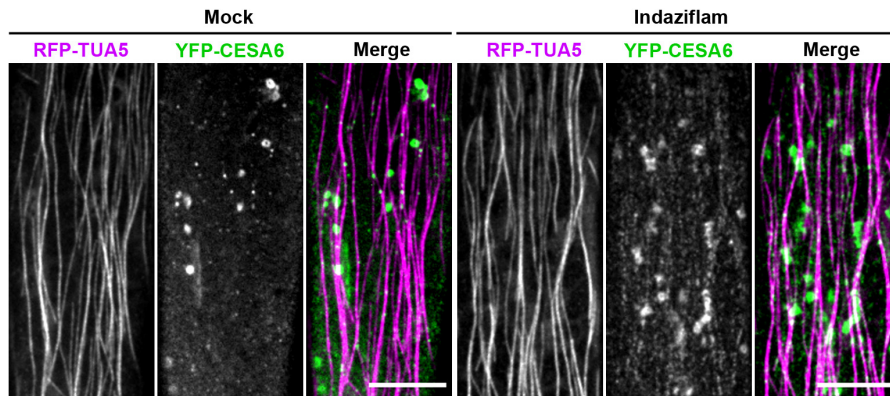

**Fig S3.** Indaziflam treatment increased density of PM CSCs even in the regions where CESA was less expressed. Representative single optical sections (monochrome) from epidermal cells of 0.01% DMSO mock and 500nM indaziflam treated *Arabidopsis* dark-grown seedlings are shown. Cortical microtubules were labeled by RFP-TUA5 (magenta in the merge) and CSCs were labeled by YFP-CESA6 (green in the merge). Bars = 10  $\mu$ m.

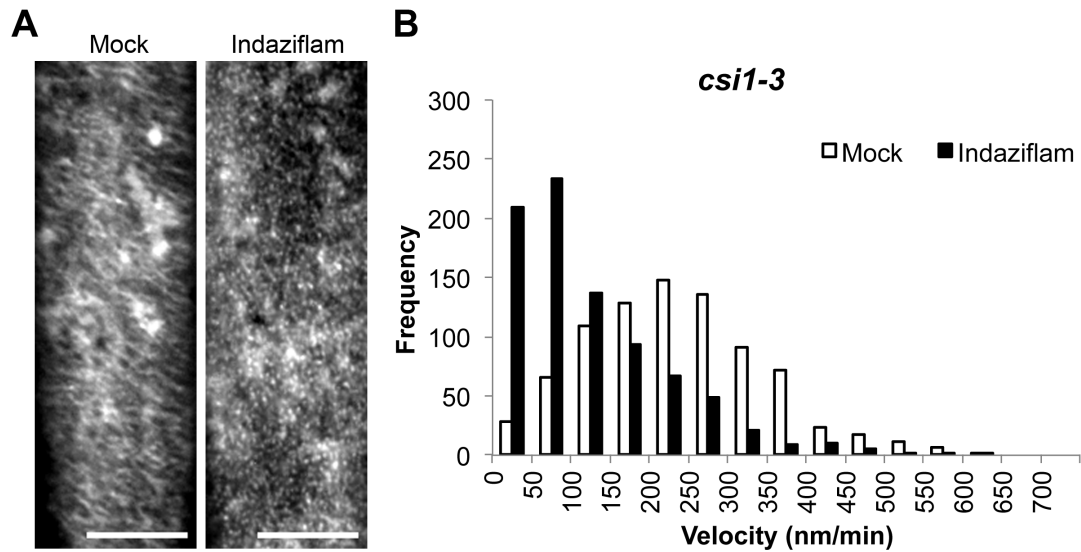

**Fig S4. Indaziflam reduced the velocity (particle movement rate) of YFP:CESA6 particles independent of *CS11*.** (A) YFP::CESA6 expressed in *csi1-3* background visualized with and without indaziflam, scale bar = 5  $\mu\text{m}$  (B) The histogram depicts the frequency of YFP:CESA6 particle velocities at the PM focal plane after a two hour treatment with indaziflam or the DMSO mock. Velocity was determined from images taken in the epidermal cells of 3-d-old dark-grown hypocotyls in the Arabidopsis mutant *csi1-3*. The white bars are the recorded velocity from the mock treatment and the black bars are of treatment with indaziflam and the YFP:CESA6 particles averaged a velocity of 236 and 125  $\text{nm min}^{-1}$  respectively. (mean  $\pm$  1 SE).

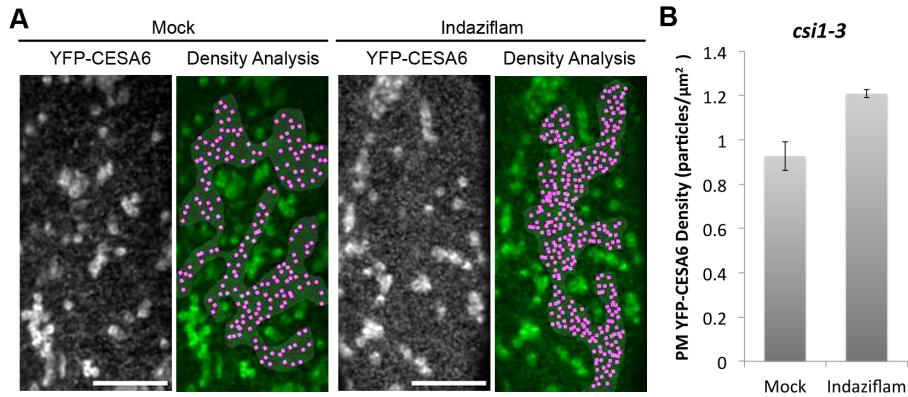

**Fig S5. Particle density analysis in *csi1* background.** Indaziflam treatment induced a higher density of CESAs at the PM. *Arabidopsis* seedlings expressing YFP-CESA6 were grown in the dark for three days before imaging. **(A)** Representative images and analysis of the PM-localized YFP-CESA6 particles in *prc1-1*, *csi1-3* background are shown. Single optical sections (monochrome) show the distribution of YFP-CESA6 labeled puncta upon 2h 0.01% DMSO mock treatment (left) or 500nM indaziflam treatment (right). The green/magenta overlay is a spatial count of the puncta that display morphology and motility consistent with PM YFP-CESA6 particles. A gray mask indicates the region of interest (ROI) lacking underlying intracellular compartments, and magenta dots indicate local maxima of the fluorescence signal. Bars = 10 μm. **(B)** Upon indaziflam treatment, average density of YFP-CESA6 puncta at the PM increased independent of *csi1-3*. Error bars are ± 1 SE from the mean.

**Supplementary online Movie S1.**

**Supplementary online Movie S2.**
